# Supplementary material for: Embedding AIE-type Ag28Au1 nanoclusters within ZIF-8 for improved photodynamic wound healing through bacterial eradication
Source: Royal Society of Chemistry journal article supplement (doi:10.1039/d4nr01769b), 2024-01-01
Supplement: d4nr01769b1.pdf [file d4nr01769b1.pdf]

## Supporting information

### Embedding AIE-featured Ag<sub>28</sub>Au<sub>1</sub> nanoclusters with ZIF-8 for improved photodynamic wound healing through bacterial eradication

Qiuxia He,<sup>a</sup> Zhen Jiang,<sup>a</sup> Hongli Jiang,<sup>c</sup> Songjie Han,<sup>a</sup> Guoping Yang,<sup>\*b</sup> Xun Yuan<sup>\*a</sup> and Haiguang Zhu<sup>\*a</sup>

<sup>a</sup>College of Materials Science and Engineering, Qingdao University of Science and Technology (QUST), 53 Zhengzhou Rd., Shibei District, Qingdao 266042, P. R. China. Email address: [yuanxun@qust.edu.cn](mailto:yuanxun@qust.edu.cn) (Xun Yuan), [zhuhg@qust.edu.cn](mailto:zhuhg@qust.edu.cn) (Haiguang Zhu).

<sup>b</sup>School of Chemistry, Biology and Material Science, Jiangxi Province Key Laboratory of Synthetic Chemistry, Jiangxi Key Laboratory for Mass Spectrometry and Instrumentation, East China

<sup>c</sup>University of Technology, Nanchang 330013, China. Department of Respiratory and Critical Care Medicine, Qingdao Eighth People's Hospital, Qingdao 266121, China.

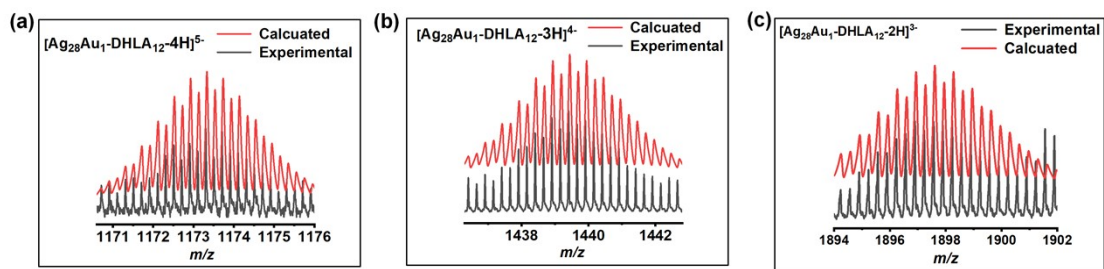

**Figure S1.** Isotope patterns of (a)  $[\text{Ag}_{28}\text{Au}_1(\text{DHLA})_{12}\text{-4H}]^{5-}$ , (b)  $[\text{Ag}_{28}\text{Au}_1(\text{DHLA})_{12}\text{-3H}]^{4-}$ , and (c)  $[\text{Ag}_{28}\text{Au}_1(\text{DHLA})_{12}\text{-2H}]^{3-}$  species acquired experimentally (black curve) and theoretically (red curve).

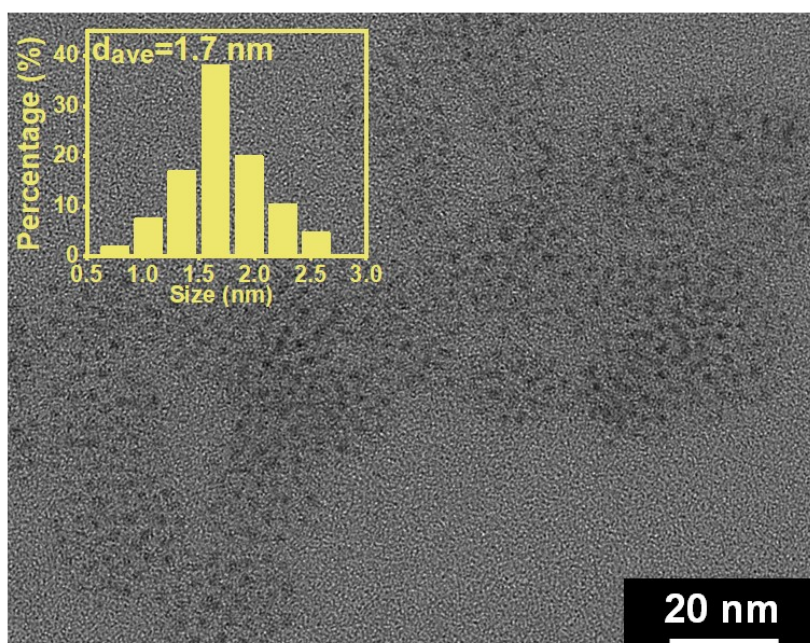

**Figure S2.** TEM image and size distribution histogram (inset) of the  $\text{Ag}_{28}\text{Au}_1$  NCs.

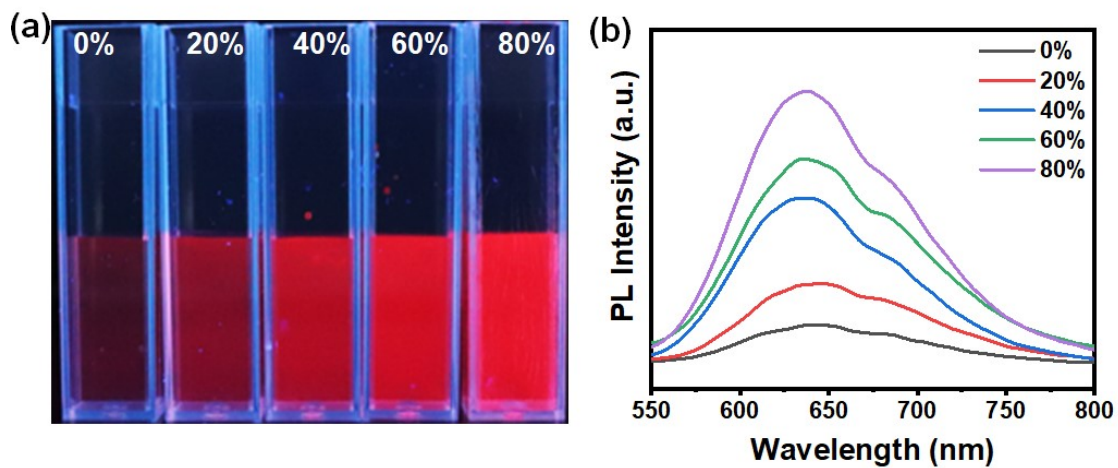

**Figure S3.** (a) Digital photos of AIE-typed  $\text{Ag}_{28}\text{Au}_1$  NCs in mixed solvents of methanol and water with increasing methanol concentration. (b) The PL spectra of AIE-typed  $\text{Ag}_{28}\text{Au}_1$  NCs in mixed solvents with increasing methanol concentration.

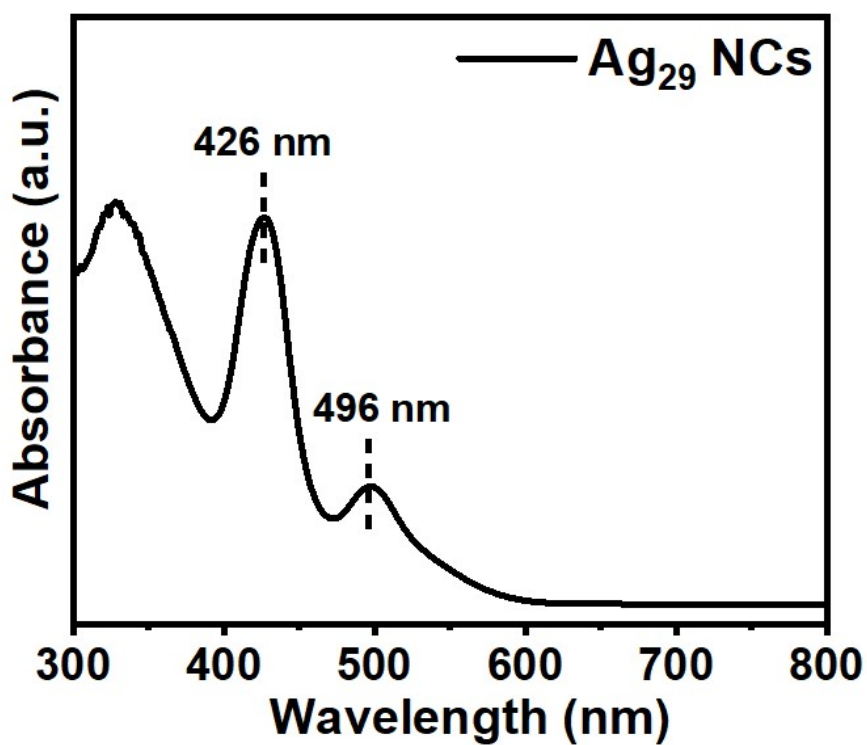

**Figure S4.** UV-visible absorption spectrum of  $\text{Ag}_{29}$  NCs.

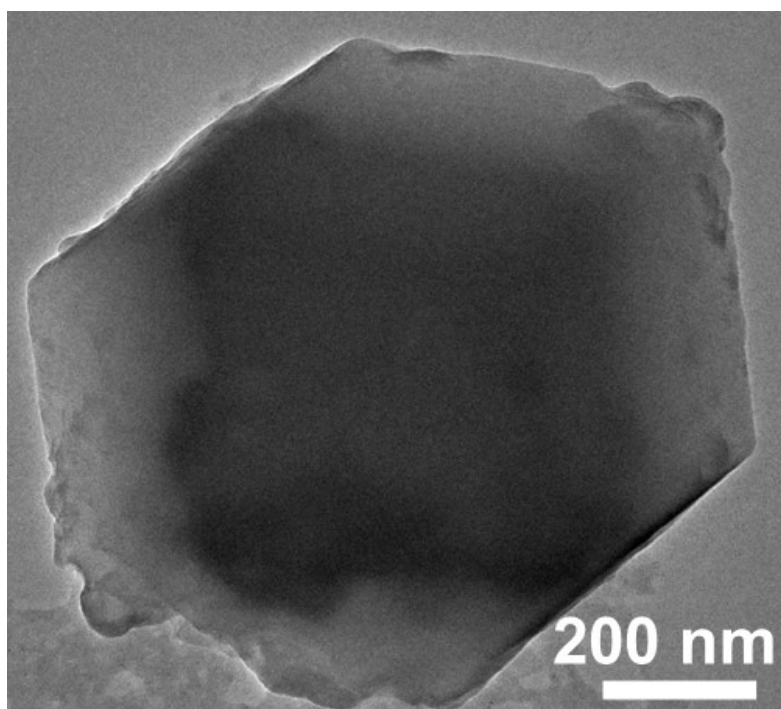

**Figure S5.** TEM image of the pristine ZIF-8.

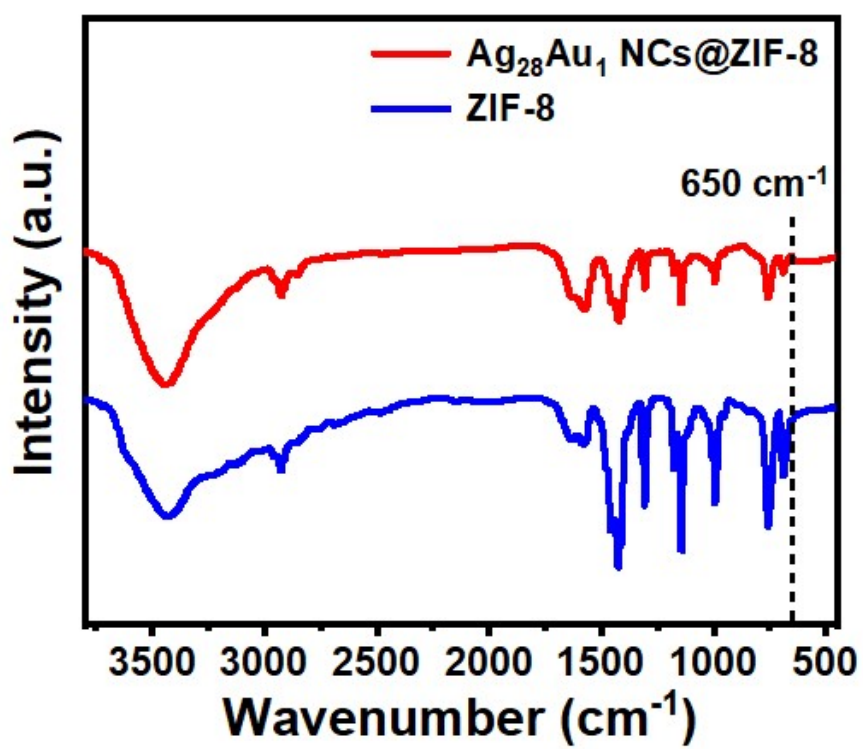

**Figure S6.** FTIR spectra of  $\text{Ag}_{28}\text{Au}_1$  NCs@ZIF-8 and ZIF-8.

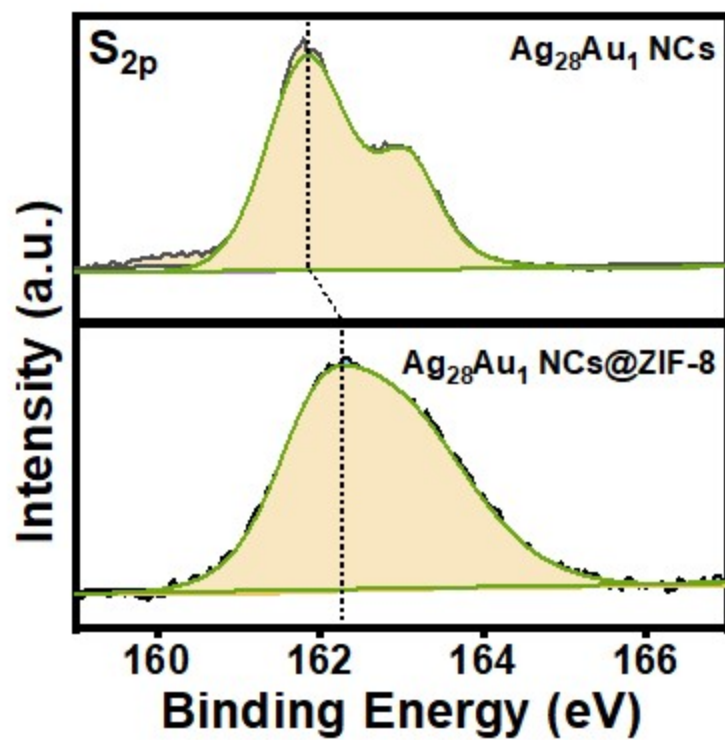

**Figure S7.** High-resolution XPS of S<sub>2p</sub> in the Ag<sub>28</sub>Au<sub>1</sub> NCs@ZIF-8 and Ag<sub>28</sub>Au<sub>1</sub> NCs.



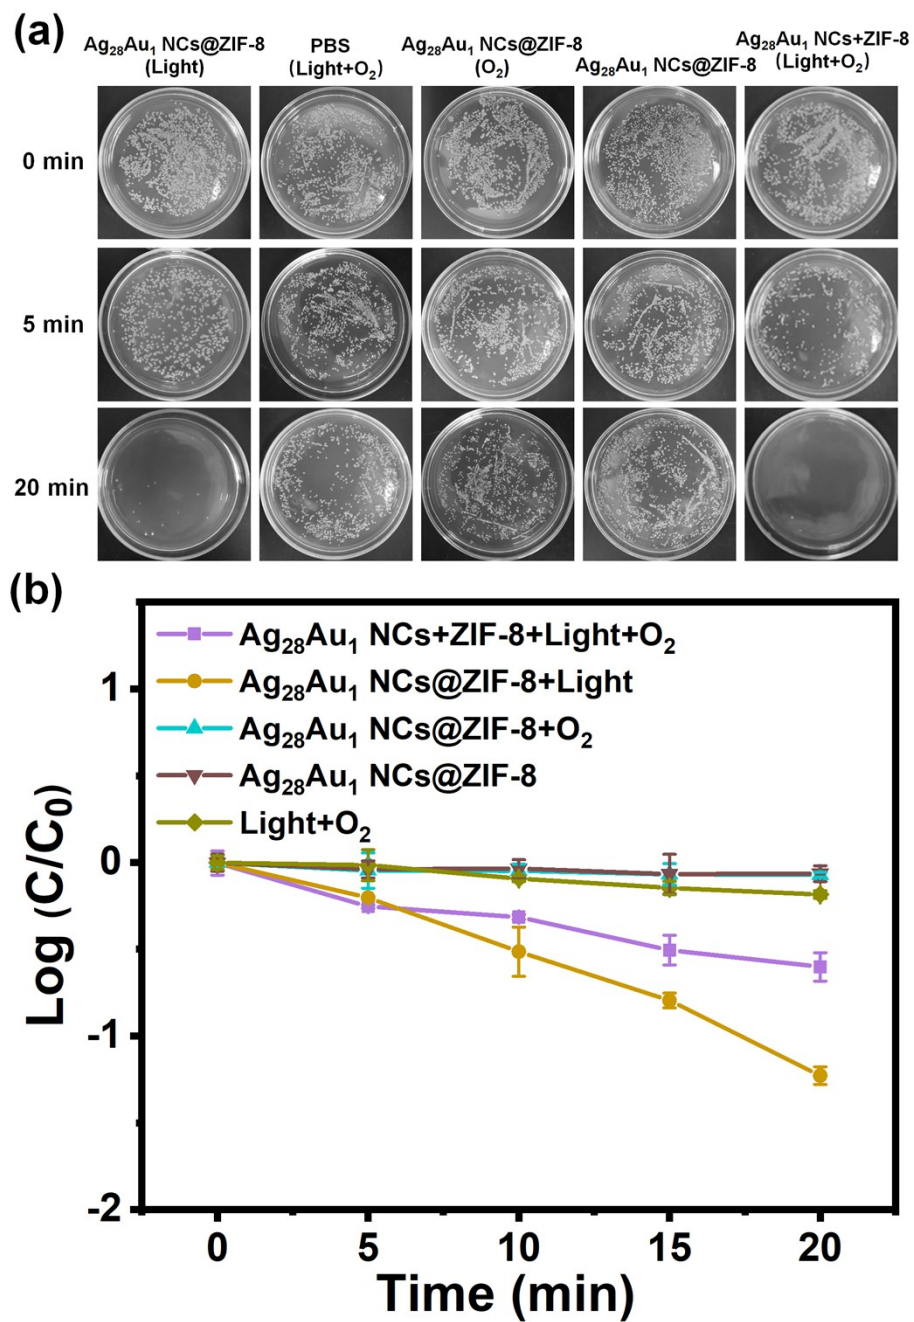

**Figure S8.** (a) Bacterial colony growth of *E. coli* treated with various samples under different conditions. (b) Bactericidal activity of various samples against *E. coli* under different conditions.

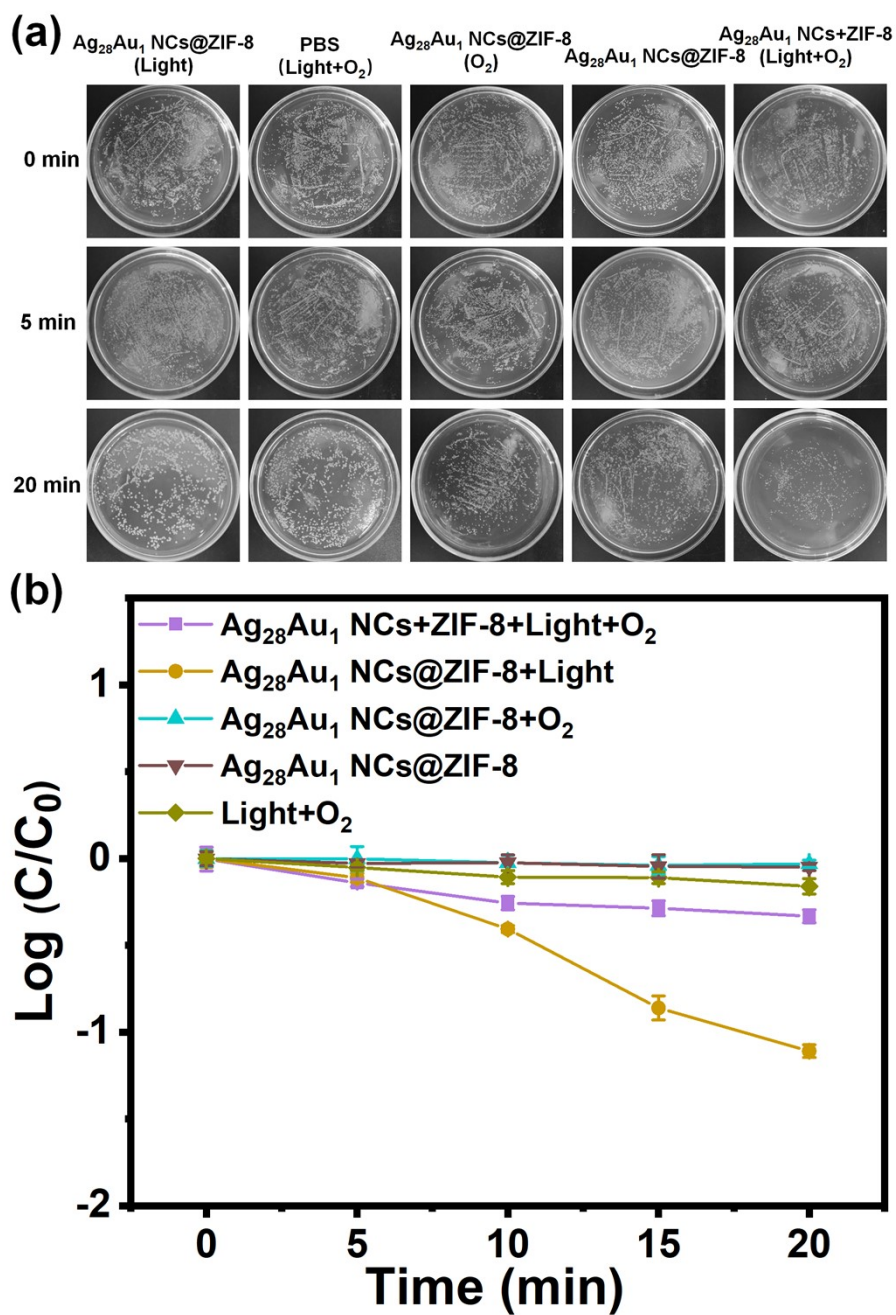

**Figure S9.** (a) Bacterial colony growth of *S. aureus* treated with various samples under different conditions. (b) Bactericidal activity of various samples against *S. aureus* under different conditions.

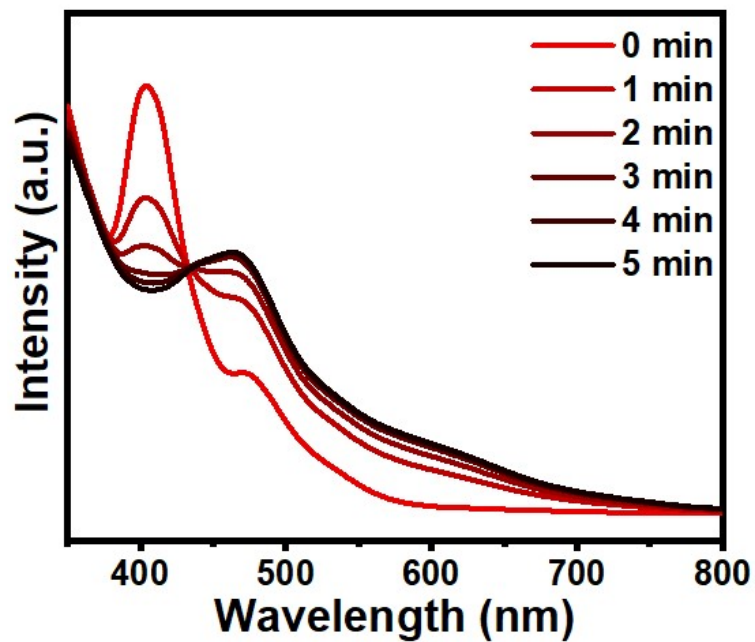

**Figure S10.** The UV-visible absorption spectra of the pristine  $\text{Ag}_{28}\text{Au}_1$  NCs under visible light irradiation within 5 min.

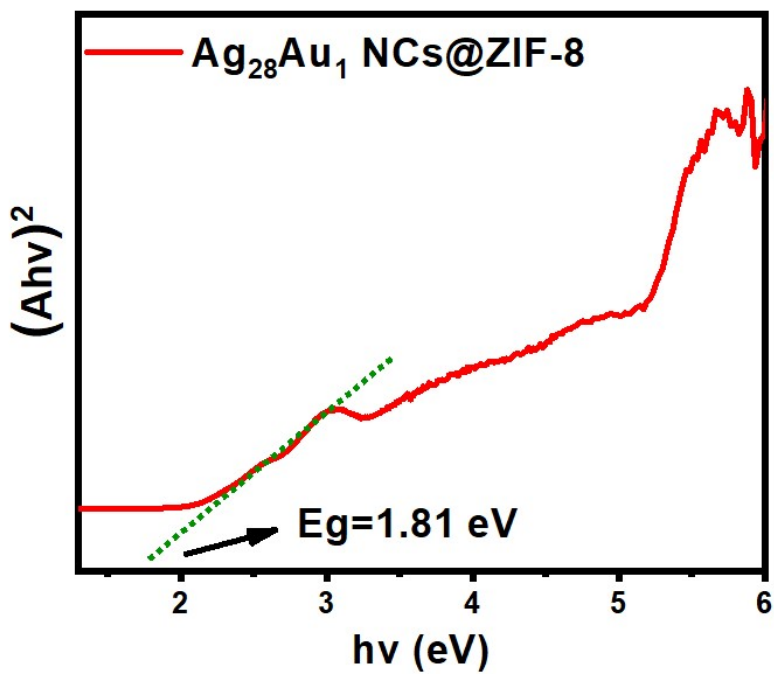

**Figure S11.** The plot of  $(Ah\nu)^2$  versus photon energy of  $\text{Ag}_{28}\text{Au}_1$  NCs@ZIF-8.



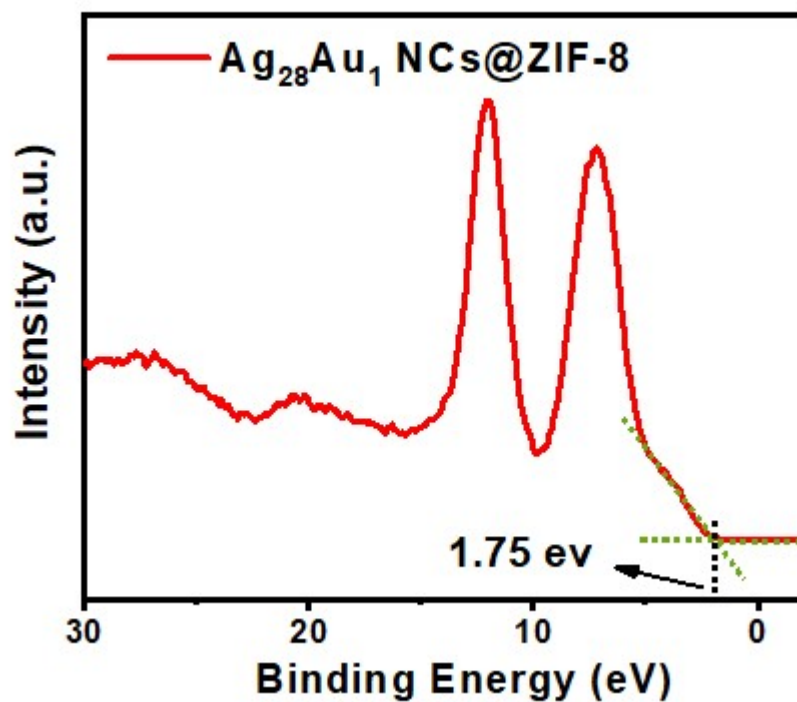

Figure S12. The VB-XPS of Ag<sub>28</sub>Au<sub>1</sub> NCs@ZIF-8.

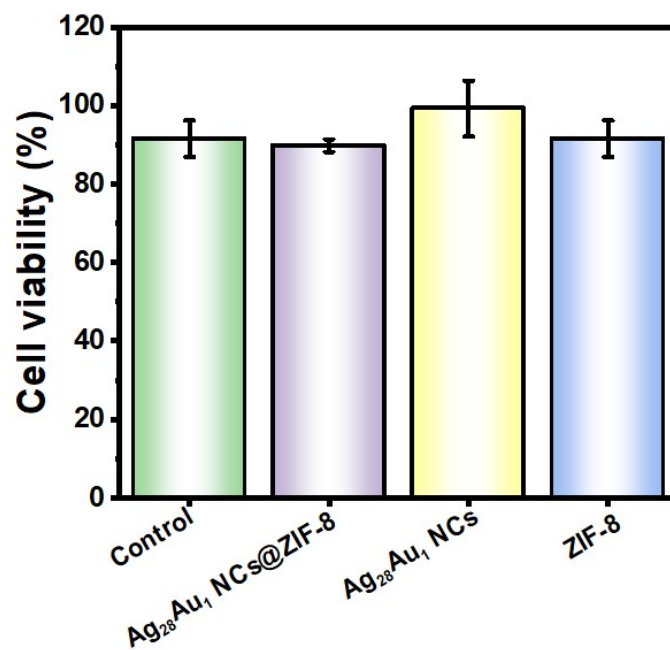

Figure S13. The cell viability incubated with carbomer (control) and various photodynamic antibacterial agents (dispersed in carbomer) incubated for 24 h.

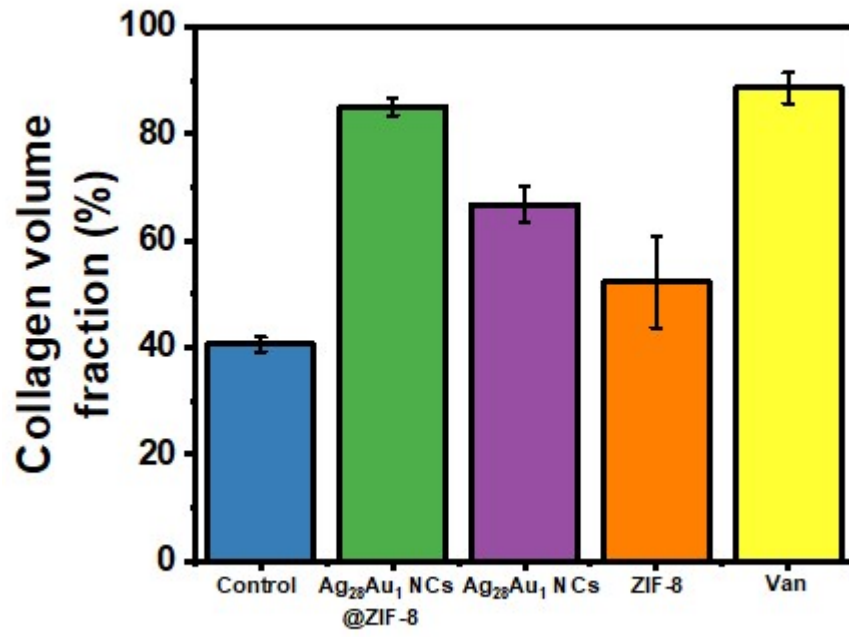

**Figure S14.** The collagen contents in tissue slices collected from different treatment groups on day

11.
